# Supplementary material for: Downregulation of miRNA-205 Expression and Biological Mechanism in Prostate Cancer Tumorigenesis and Bone Metastasis
Source: PubMed Central journal article supplement (PMC7646560; doi:10.1155/2020/6037434), 2020-10-29

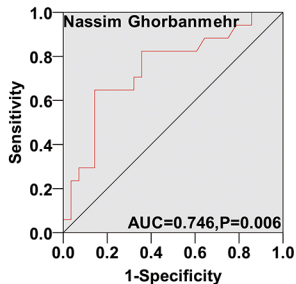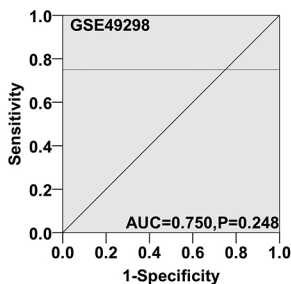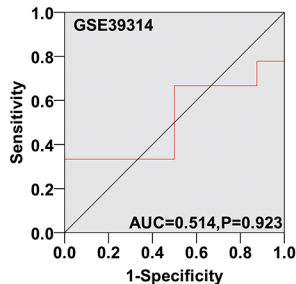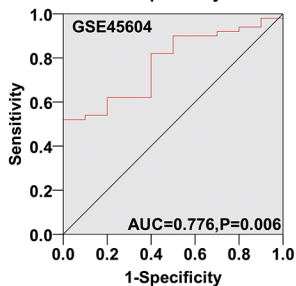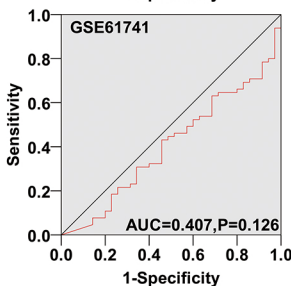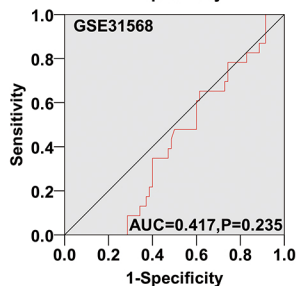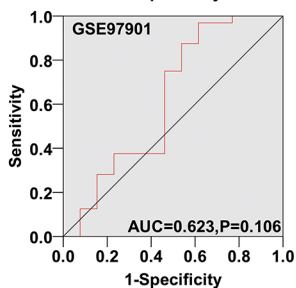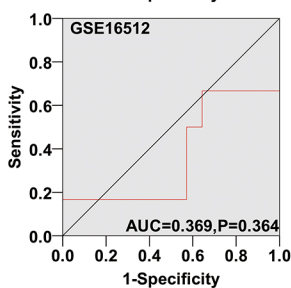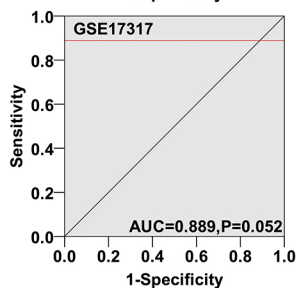

Supplement: 6037434.f4.pdf [file 6037434.f4.pdf]
